# Supplementary material
Source: PubMed Central journal article supplement (PMC4808152)
Supplement: AAC.01753-15_zac004165071so1.pdf [file AAC.01753-15_zac004165071so1.pdf]

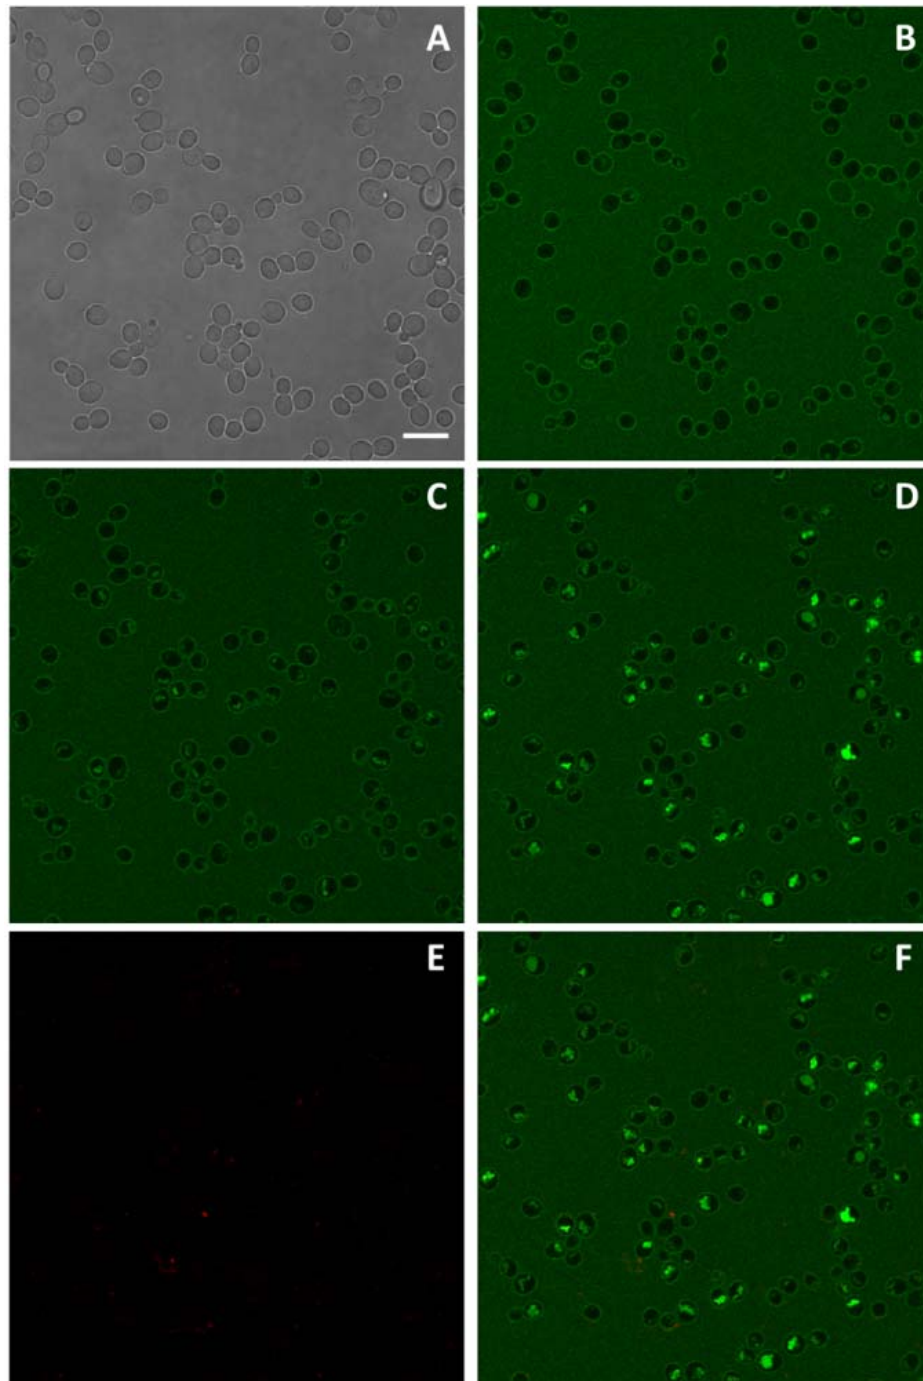

**Fig. S1.** Internalization of V3A asd into *Candida albicans* SC5314 cells. Confocal images of living yeast cells incubated in the presence of fluorescein-labelled V3A for 15 min (panel B), 60 min (panel C) and 300 min (panel D). The same field is shown by light transmission image (panel A, 15 min). Bar = 10  $\mu$ m. After 60 min, and even more so after 300 min, V3A is concentrated in yeast cells, still viable, as assessed by the lack of internalization of propidium iodide (panel E propidium iodide, 300 min, panel F, merge D + E).

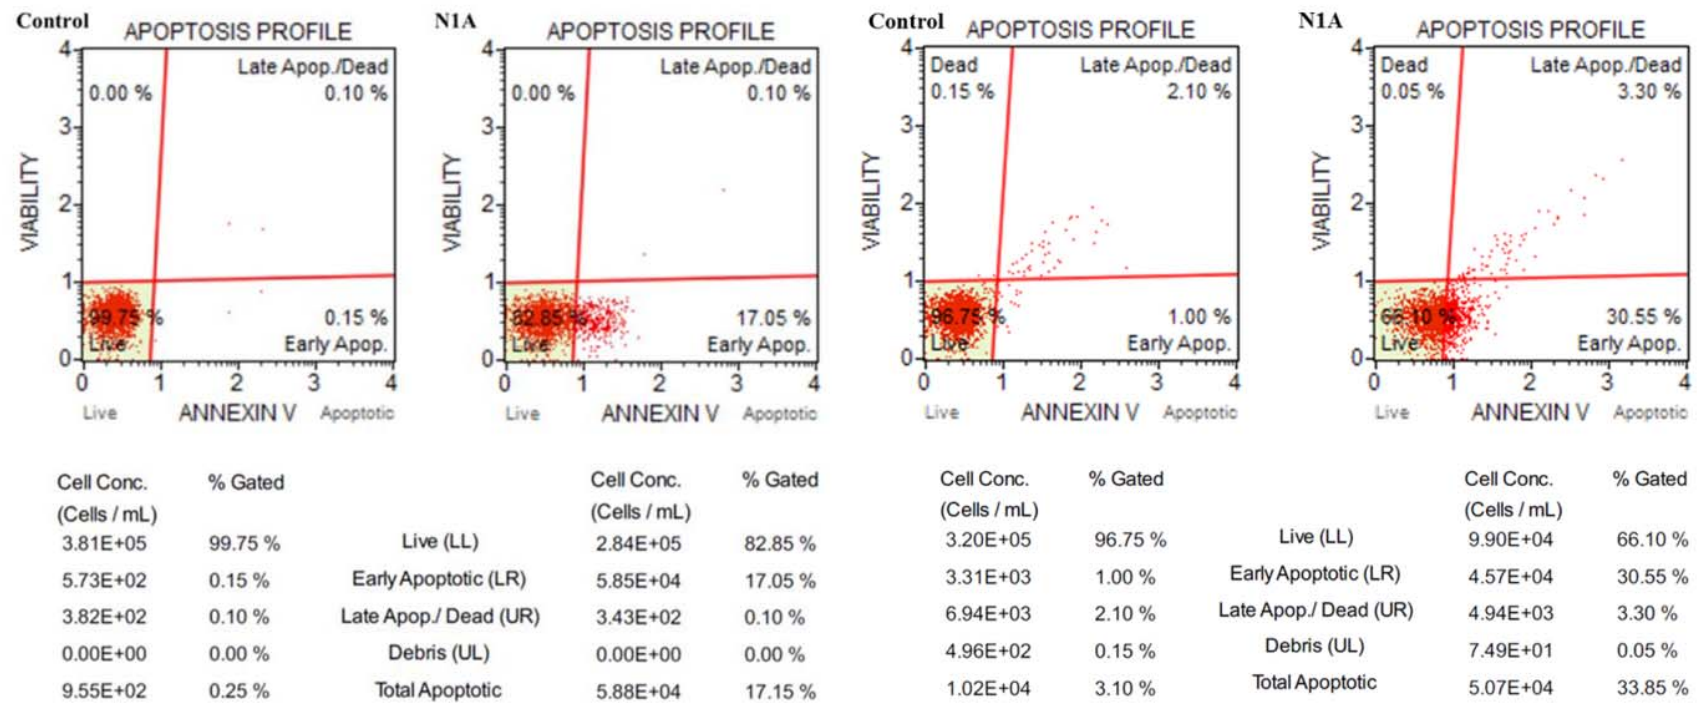

**Fig. S2.** Apoptotic profile from a single assay performed on *Candida albicans* cells treated with N1A for 30 minutes (left) and 120 minutes (right), in comparison with untreated cells (control, left 30 minutes, right 120 minutes). Note the reduction of the total number of gated cells in treated samples. Non apoptotic dead cells are not included in the number of gated cells, being below the threshold settings based on the size index. LL: lower left quadrant; LR: lower right quadrant; UR: upper right quadrant; UL: upper left quadrant.

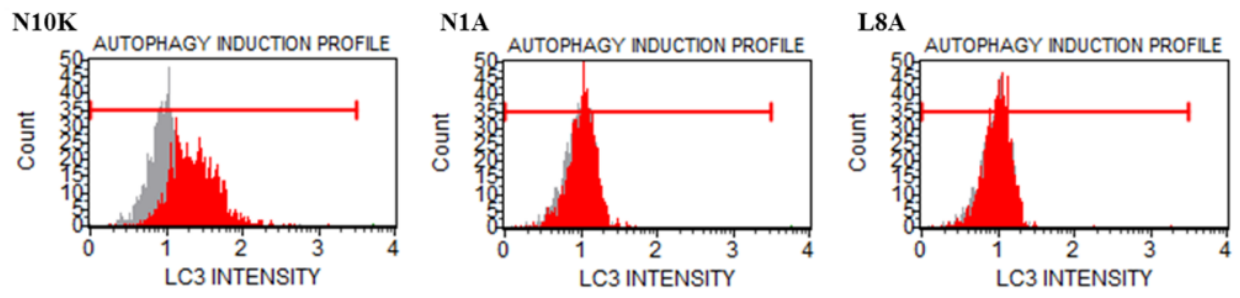

**Fig. S3.** Autophagy induction profile from a single assay performed on *Candida albicans* cells treated for 30 minutes with N10K, N1A, and L8A (red), in comparison with untreated cells (control, gray).

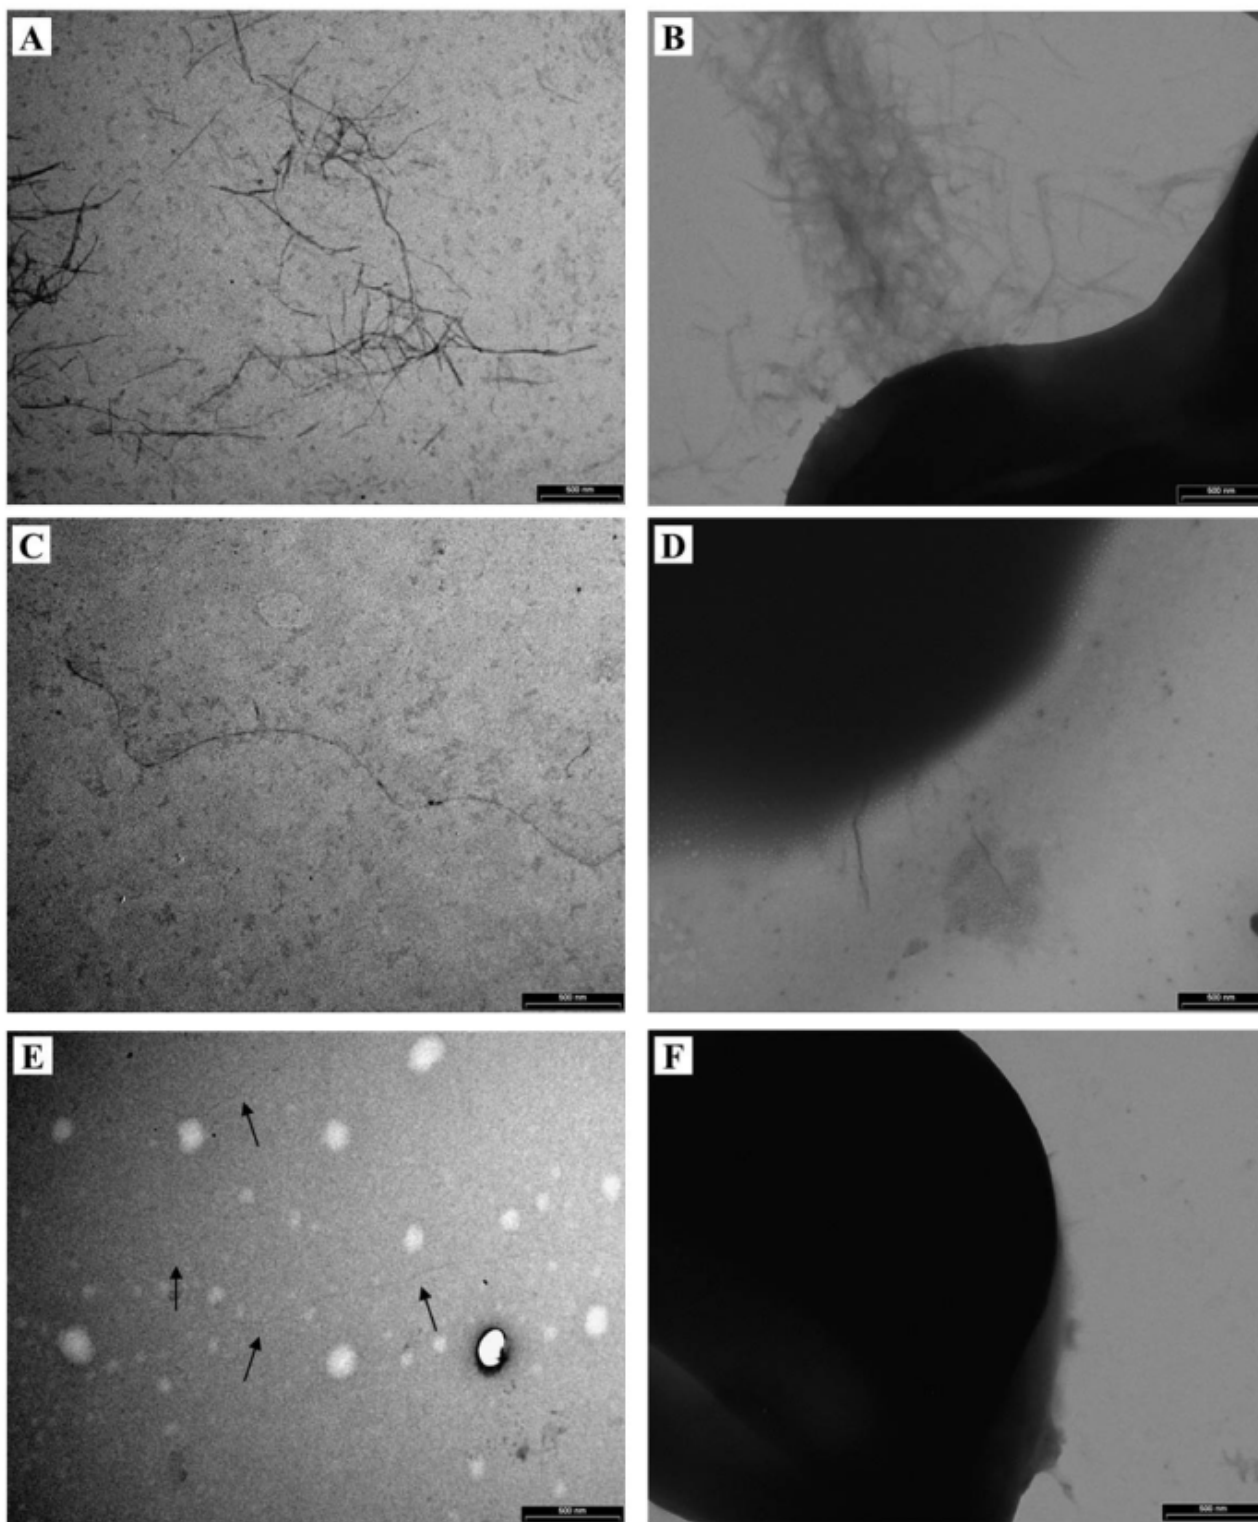

**Fig. S4.** TEM images of negatively stained solutions of N1A, prepared soon after peptide solubilization in absence (left panels) or in presence (right panels) of *Candida albicans* cells, showing aggregation in fibril-like structures. Panels A and B, N1A 100  $\mu\text{M}$ ; Panels C and D, N1A 5  $\mu\text{M}$ ; Panels E and F, N1A 0,59  $\mu\text{M}$  ( $\text{EC}_{50}$  value). Bars = 500 nm.

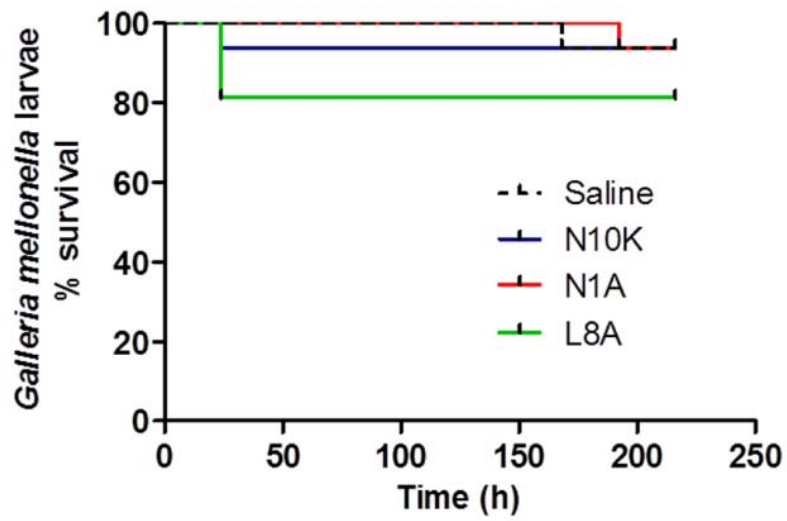

**Fig. S5.** Toxicity studies in *Galleria mellonella* larvae. Groups of sixteen larvae were inoculated with peptides (10  $\mu\text{mol/kg}$ , single injection 10  $\mu\text{l}$ ) or saline solution (control group). The survival curves of treated larvae were not significantly different from the one of control group, as assessed by Mantel-Cox log-rank test.
